# Supplementary material
Source: PubMed Central journal article supplement (PMC4126090)
Supplement: jcbfm201483x1.pdf [file jcbfm201483x1.pdf]

**Supplementary Table I.** DNA sequences of the primers used for RT-PCR.

| <b>Mouse cDNAs</b> | <b>RT-PCR methods</b>   | <b>Primer sequences</b>                                                      | <b>GenBank accession No.</b> |
|--------------------|-------------------------|------------------------------------------------------------------------------|------------------------------|
| <i>β-actin</i>     | Real-time & Traditional | Forward, 5'-ATCCGTAAAGACCTCTATGC-3'<br>Reverse, 5'-AACGCAGCTCAGTAACAGTC-3'   | NM_007393                    |
| <i>Ccl2</i>        | Real-time               | Forward, 5'-TCAGCCAGATGCAGTTAACG-3'<br>Reverse, 5'-GATCCTCTTGTAGCTCTCCAGC-3' | NM_011333                    |
| <i>Cxcl1</i>       | Real-time               | Forward, 5'-CACACTCAAGAATGGTCGCGA-3'<br>Reverse, 5'-TTGTCAGAAGCCAGCGTTCAC-3' | NM_008176                    |
| <i>Cxcl10</i>      | Real-time               | Forward, 5'-AAGTGCTGCCGTCATTTTCT-3'<br>Reverse, 5'-GTGGCAATGATCTCAACACG-3'   | NM_021274                    |
| <i>Icam-1</i>      | Real-time               | Forward, 5'-AGATCACATTCACGGTGCTG-3'<br>Reverse, 5'-CTTCAGAGGCAGGAAACAGG-3'   | NM_010493                    |
| <i>Il-1β</i>       | Real-time               | Forward, 5'-AGTTGCCTTCTTGGGACTGA-3'<br>Reverse, 5'-TCCACGATTTCCAGAGAAC-3'    | NM_008361                    |
| <i>Lcn2</i>        | Real-time               | Forward, 5'-CCCCATCTCTGCTCACTGTC-3'<br>Reverse, 5'-TTTTTCTGGACCGCATTG-3'     | NM_008491                    |
| <i>Tnf-α</i>       | Real-time               | Forward, 5'-ATGGCCTCCCTCTCAGTTC-3'<br>Reverse, 5'-TTGGTGGTTTGCTACGACGTG-3'   | NM_013693                    |
| <i>24p3r</i>       | Traditional             | Forward, 5'-AATGACTCTCACGGGGATTG-3'<br>Reverse, 5'-AGTGGTGGGGATGACTTCAG-3'   | NM_021551                    |
| <i>Lcn2</i>        | Traditional             | Forward, 5'-ATGTCACCTCCATCCTGGTC-3'<br>Reverse, 5'-CACACTCACCACCCATTTCAG-3'  | NM_008491                    |

# Supplementary Fig. I

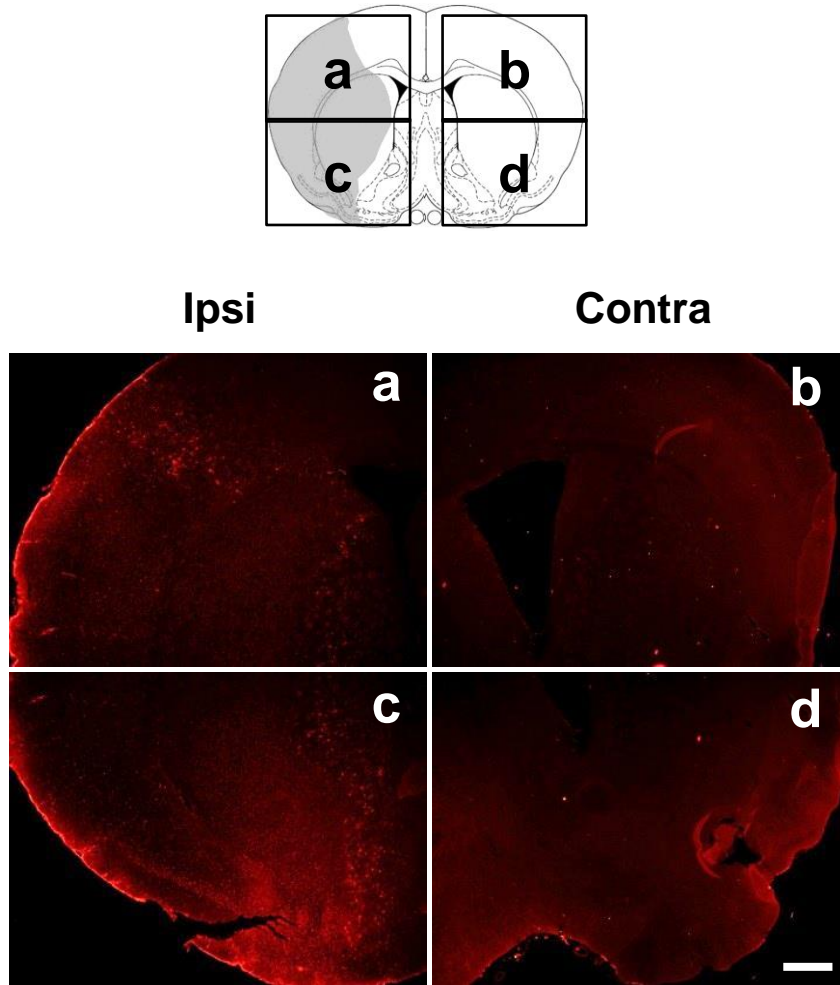

**Supplementary Figure I. Induction of LCN2 protein in the whole brain after ischemia/reperfusion.** Immunofluorescence staining and the subsequent examination with low magnification revealed an overview of the LCN2 expression in the whole brain at 24 hr after reperfusion. The shaded area indicates the infarcted region. Scale bar = 500  $\mu$ m. Contra = contralateral hemisphere; Ipsi = ipsilateral hemisphere.

# Supplementary Fig. IIAB

## A

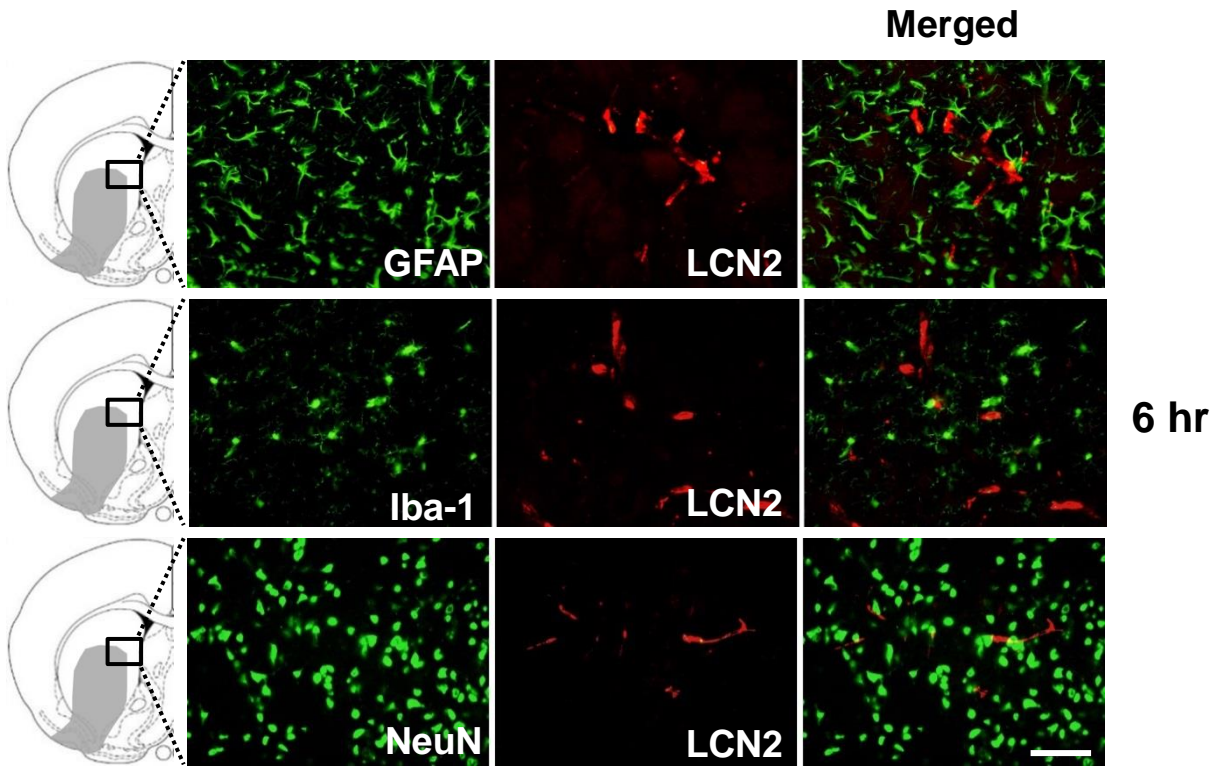

## B

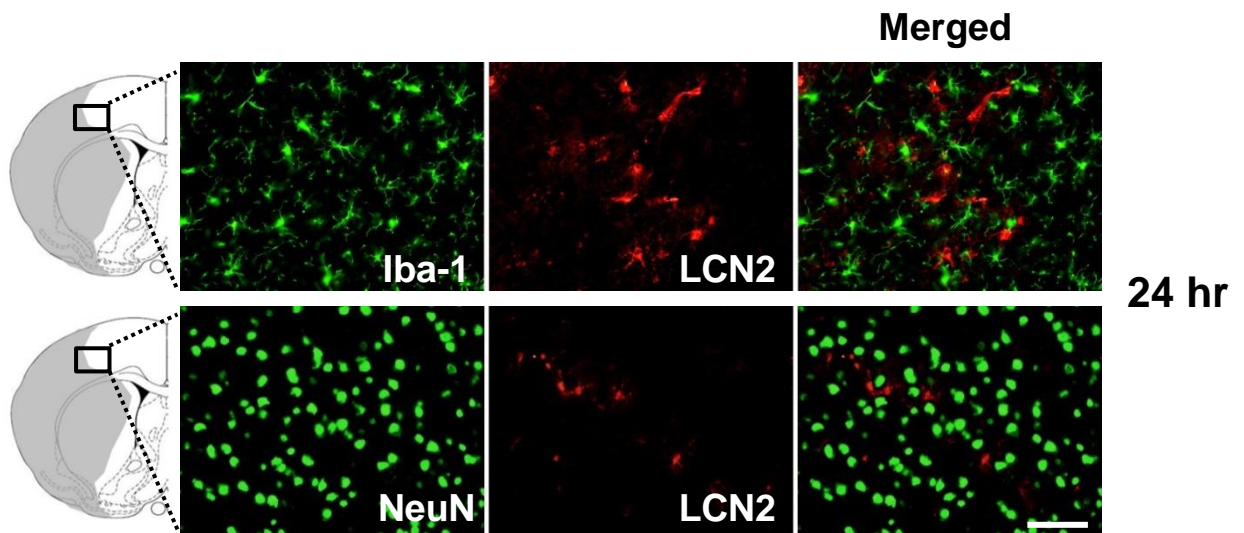

# Supplementary Fig. IICD

## C

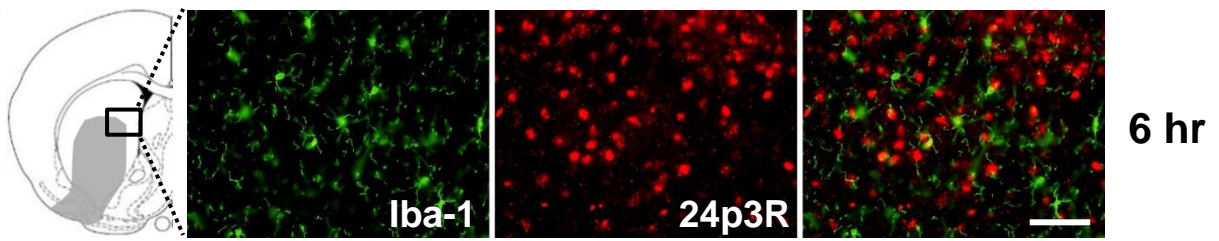

## D

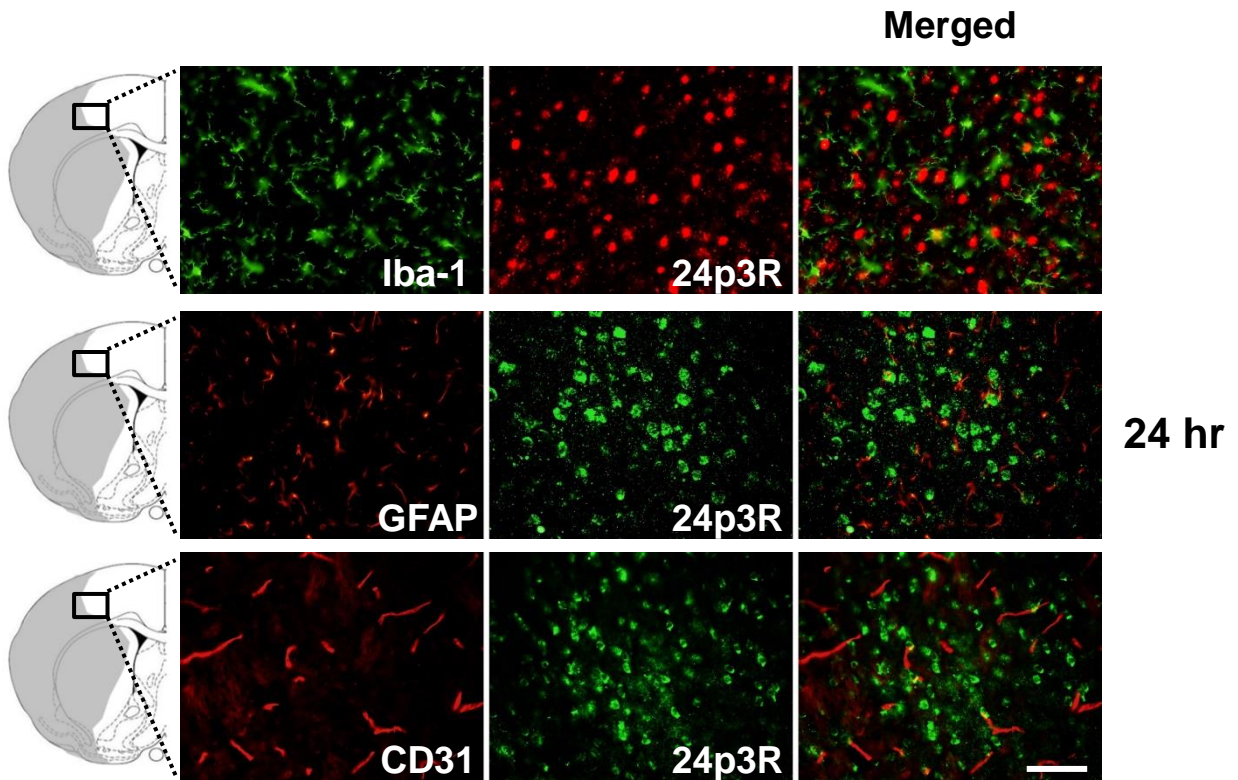

**Supplementary Figure II. Localization of LCN2 and 24p3R within ipsilateral hemispheres after ischemia/reperfusion.** Double-immunofluorescence staining for LCN2 or 24p3R and GFAP (astrocyte marker), Iba-1 (microglia marker), NeuN (neuron marker) and CD31 (endothelial cell marker). LCN2 expression was not localized in astrocytes, microglia, or neurons at 6 hr after reperfusion (A), or in microglia and neurons at 24 hr after reperfusion (B). The localization of 24p3R in microglia was not detected at 6 hr after reperfusion (C) or in microglia, astrocytes, or endothelial cells at 24 hr after reperfusion (D). Scale bar = 100  $\mu$ m. The shaded area indicates the infarcted region. Results are representative of more than three independent experiments. Co-localization is indicated by arrowheads.

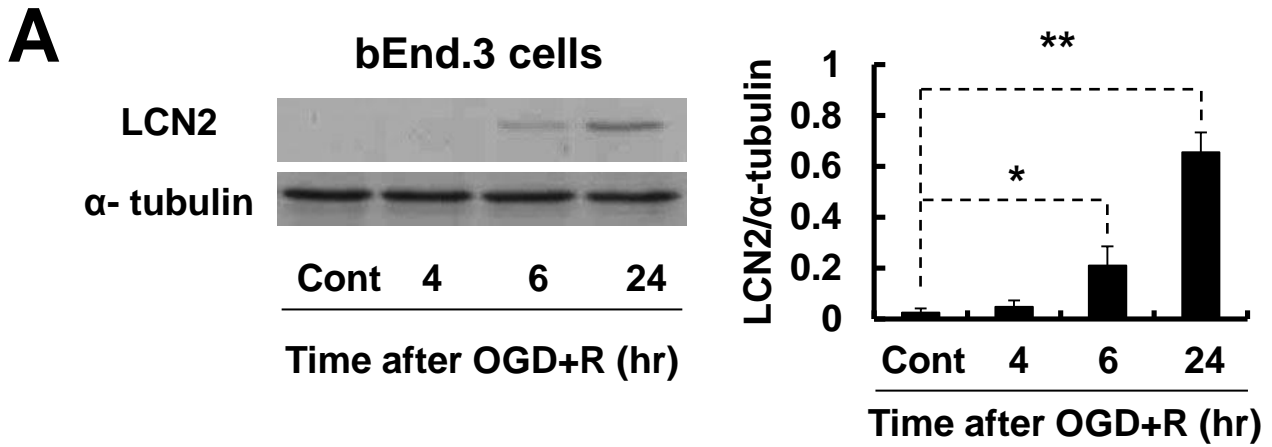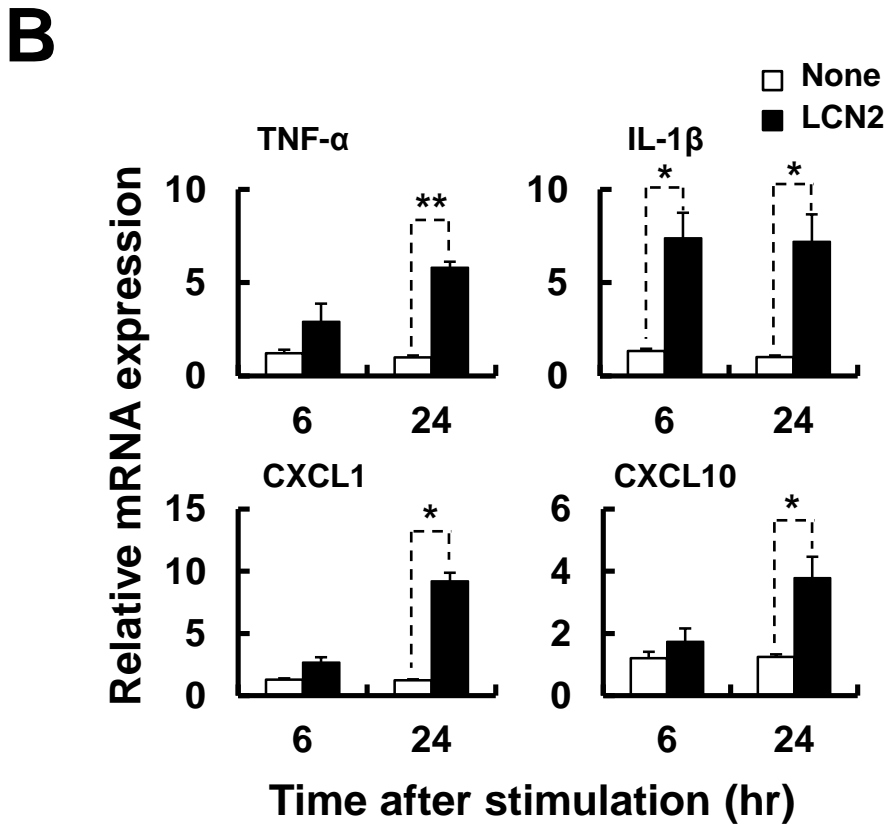

**Supplementary Figure III. Effects of LCN2 on endothelial cells.** **A**, Western blot analyses revealed the induction of LCN2 protein in bEnd.3 cells after OGD+R (*left*). Control bEnd.3 cells did not undergo OGD. Results were normalized to  $\alpha$ -tubulin, and are presented as means  $\pm$  SDs ( $n = 3$ ) (*right*), \* $P < 0.05$ , \*\* $P < 0.01$ . **B**, Relative mRNA expression of proinflammatory cytokines (TNF- $\alpha$  and IL-1 $\beta$ ) and chemokines (CXCL1 and CXCL10) in bEnd.3 cells at 6 and 24 hr after LCN2 stimulation (1.0  $\mu$ g/ml) was evaluated by Real-time RT-PCR ( $n = 3$  per group). GAPDH was used as an internal control. The nucleotide sequences of the primers used were as follows: GAPDH, forward, 5'-TGGGCTACACTGAGCACCAG-3', reverse, 5'-GGGTGTCGCTGTTGAAGTCA-3'. Results are means  $\pm$  SDs, \* $P < 0.05$ , \*\* $P < 0.01$ .

# Supplementary Fig. IV

## A

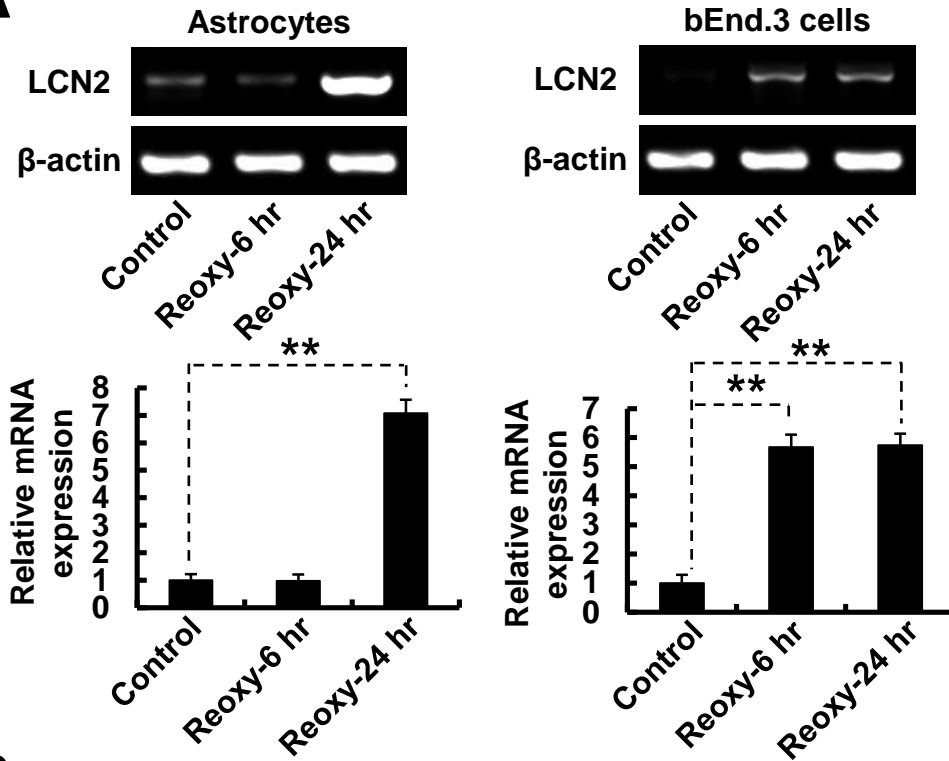

## B

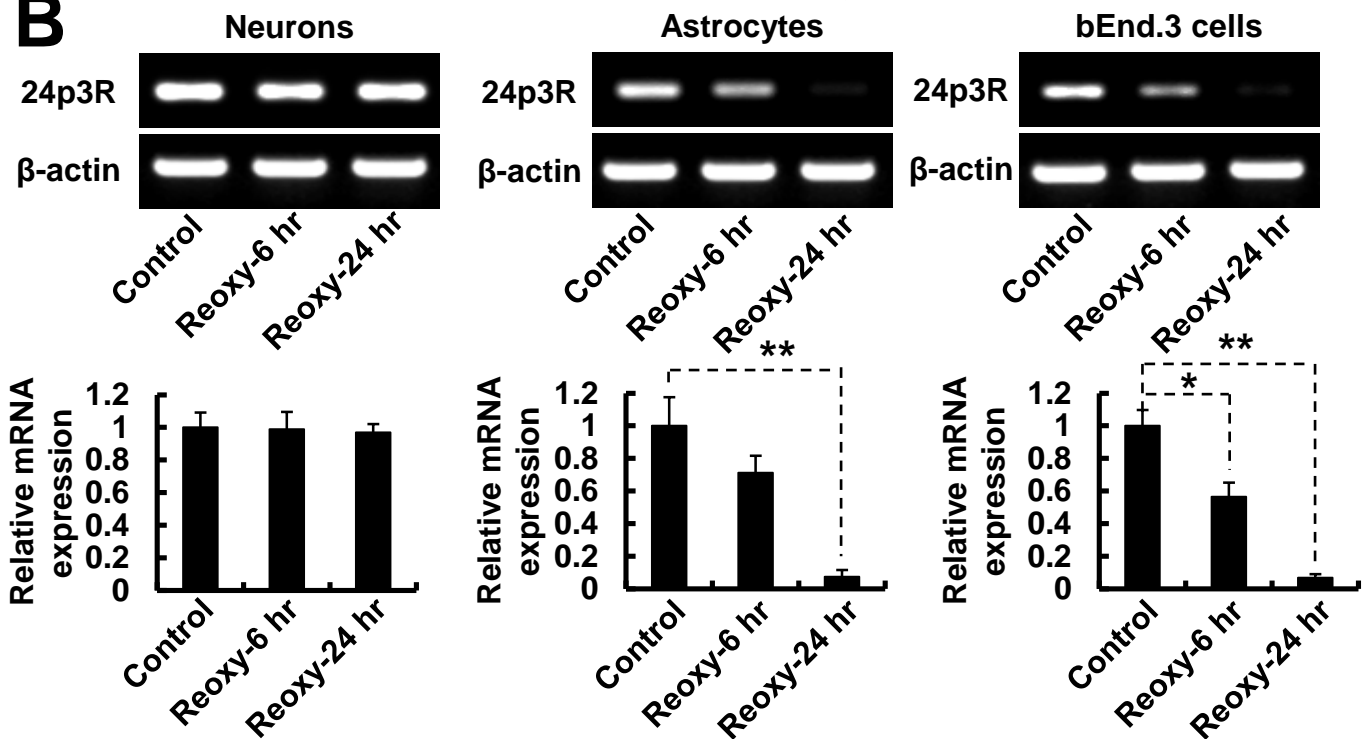

### Supplementary Figure IV. The expression of LCN2 and 24p3R after oxygen-glucose deprivation.

**A.** Levels of LCN2 mRNA expression in the primary astrocyte cultures or bEnd.3 cells were assessed by traditional RT-PCR after OGD+R. β-actin was used as an internal control. The results are representative of three independent experiments (*upper*) or means ± SDs (n = 3 per group) (*lower*), \*\*P < 0.01. **B.** Levels of 24p3R mRNA expression in the primary neurons, astrocyte cultures, and bEnd.3 cells were determined by traditional RT-PCR after OGD+R. β-actin was used as an internal control. The results are representative of three independent experiments (*upper*) or means ± SDs (n = 3 per group) (*lower*), \*\*P < 0.01.



# Supplementary Fig. V

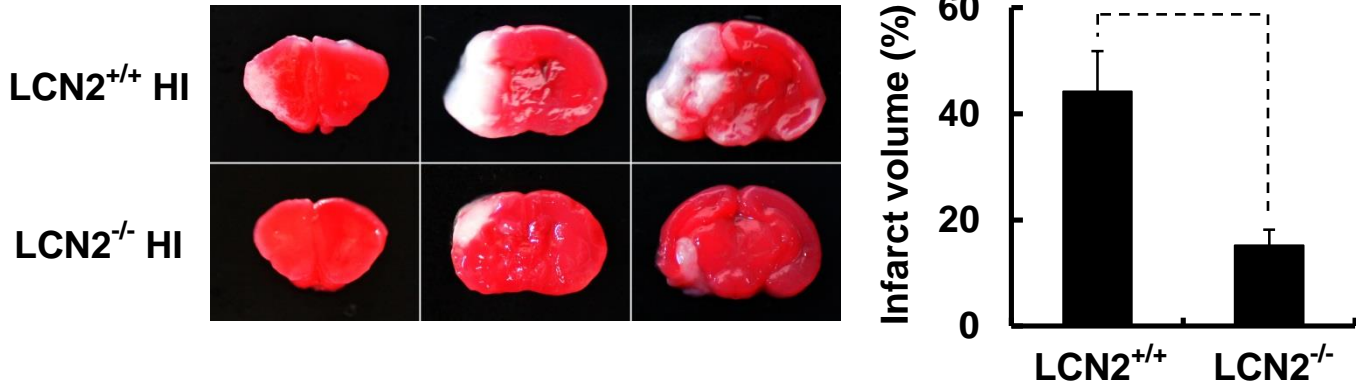

**Supplementary Figure V. LCN2 deficiency reduces infarct volume after hypoxic-ischemia in neonatal mice.** In hypoxic-ischemic (HI) brain injury model, at 48 hr after reoxygenation, infarct volume was compared between LCN2<sup>+/+</sup> and LCN2<sup>-/-</sup> mice by TTC staining of coronal sections ( $n = 5$  per group). Results are means  $\pm$  SDs, \*\* $P < 0.01$ .

# Supplementary Fig. VI

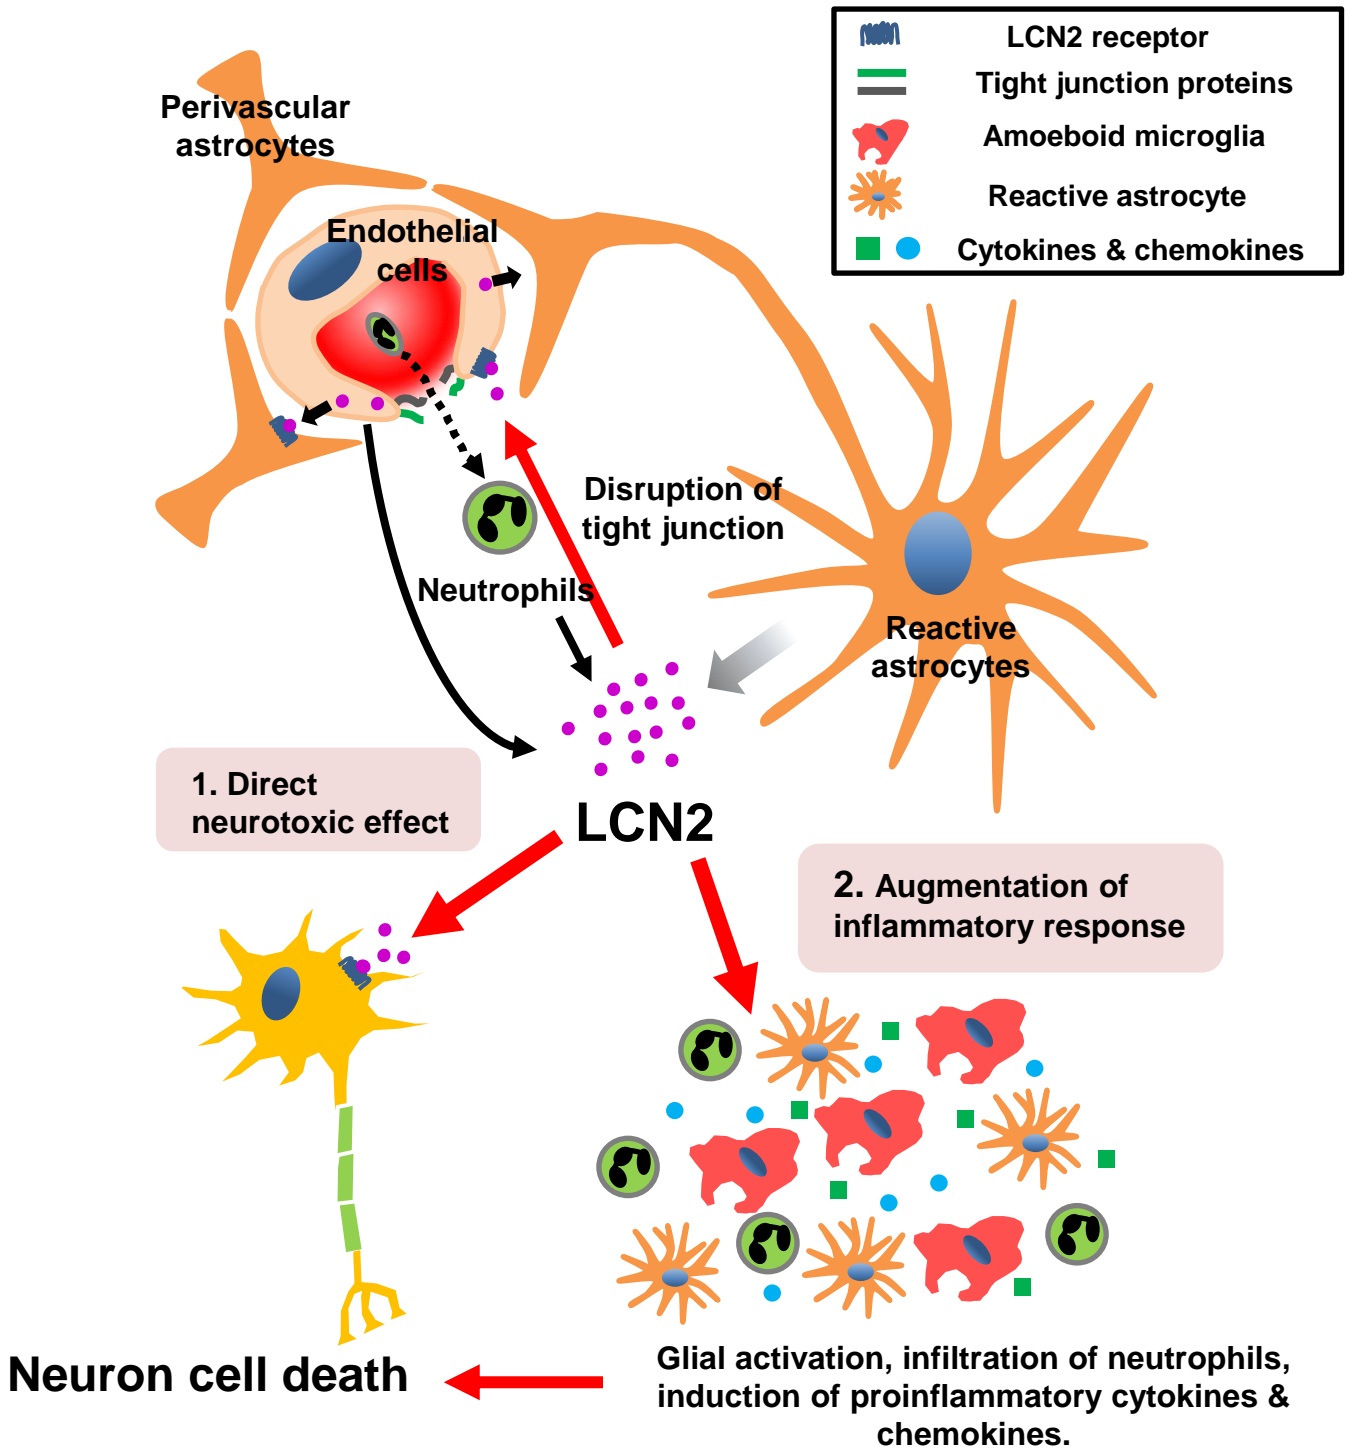

**Supplementary Figure VI. Proposed role of LCN2 in brain injury after ischemia/reperfusion.** Two putative mechanisms underlying LCN2 contribution to ischemic brain damage are illustrated: 1) LCN2 secreted by reactive astrocytes, endothelial cells, and neutrophils directly contributes to neuronal cell death by interacting with its receptor (24p3R); 2) LCN2 amplifies diverse events associated with neuroinflammation, such as glial activation, neutrophil infiltration, and the induction of proinflammatory cytokines and chemokines. LCN2 may also contribute to neuroinflammation by increasing BBB permeability via the disruption of tight junctions.
